# Supplementary material for: CeO2-promoted Cu2O-based catalyst sprayed on the gas diffusion layer for the electroreduction of carbon dioxide to ethylene
Source: Royal Society of Chemistry journal article supplement (doi:10.1039/d3ma01009k), 2024-01-01
Supplement: d3ma01009k1.pdf [file d3ma01009k1.pdf]

## Supporting Information

### CeO<sub>2</sub>-promoted Cu<sub>2</sub>O-based catalyst sprayed on gas diffusion layer for the electroreduction of carbon dioxide to ethylene

A. Alarcón<sup>a,c\*</sup>, T. Andreu<sup>a,b</sup>, and C. Ponce de León<sup>c</sup>

\*a.alarcon@ub.edu

<sup>a</sup> Facultat de Química, Universitat de Barcelona, Martí i Franquès, 1, Barcelona 08028, Spain.

<sup>b</sup> Sustainable Electrochemical Processes. Universitat de Barcelona, 08028, Barcelona, Spain.

<sup>c</sup> Electrochemical Engineering Laboratory, Energy Technology Research Group, Faculty of Engineering and Physical Sciences, University of Southampton, Highfield Campus, University Road, Southampton, SO17 1BJ, United Kingdom.

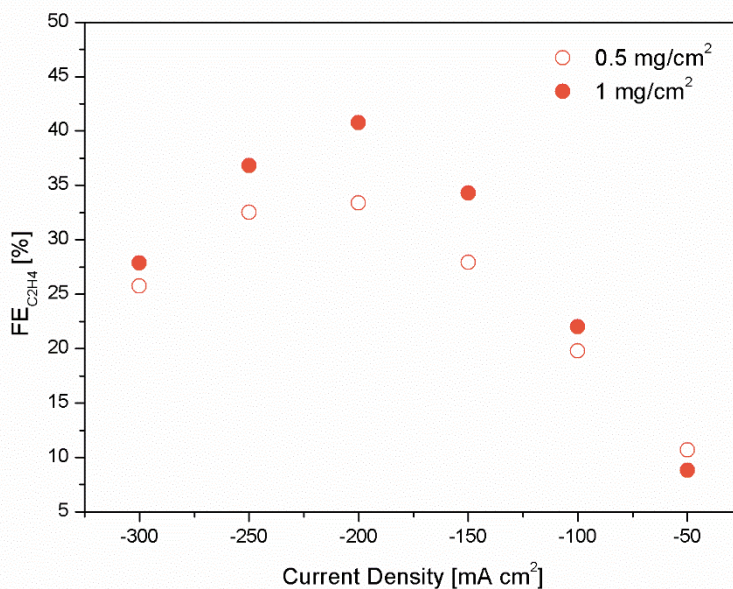

**Figure S11.** Control test of the catalyst loading.

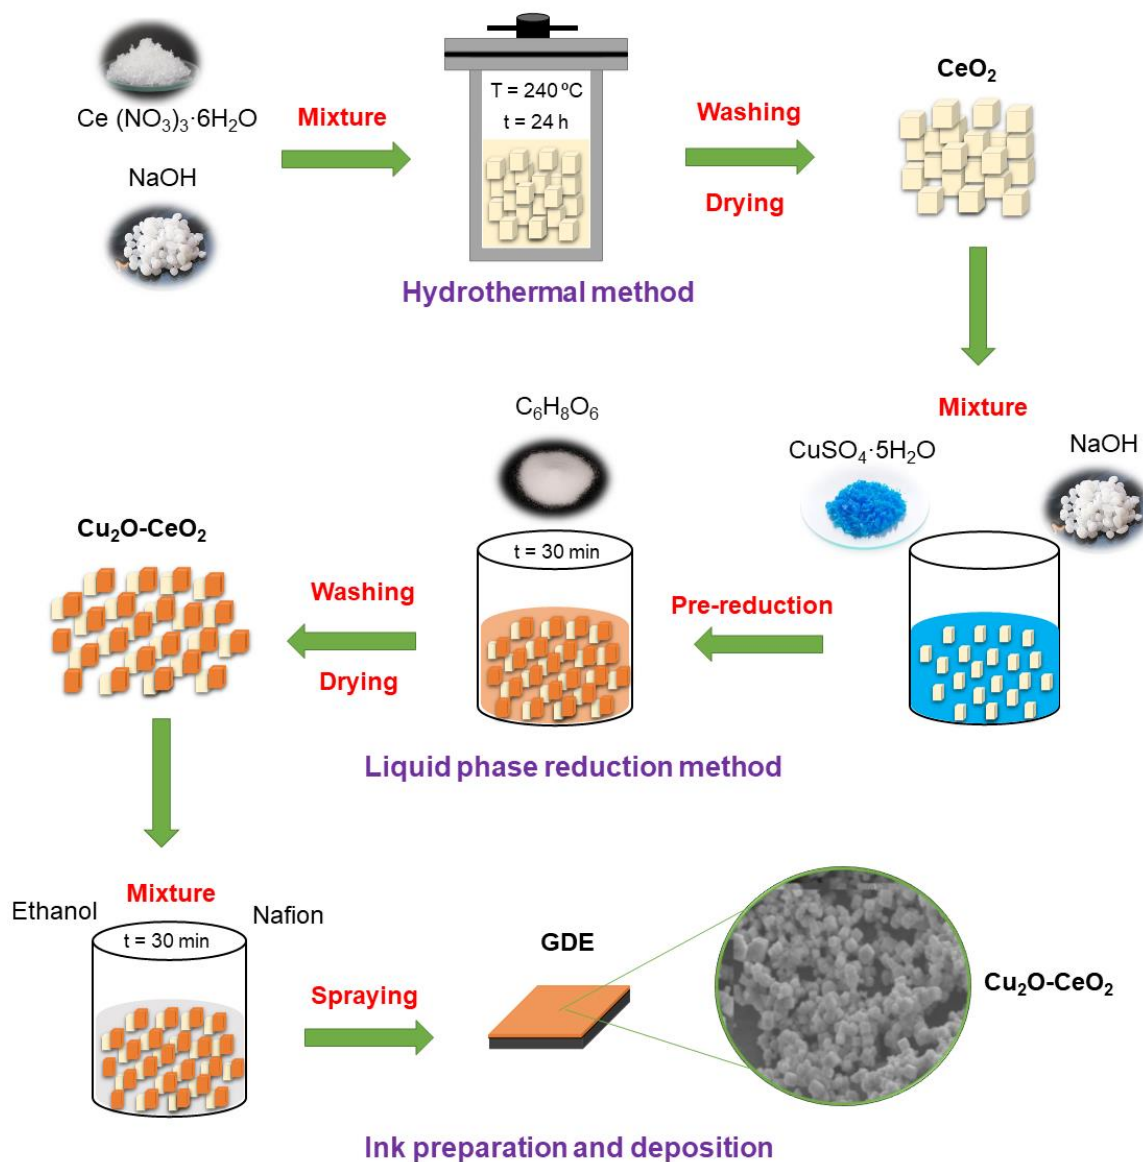

Figure S12. Schematic representation of the catalyst and GDE preparation.

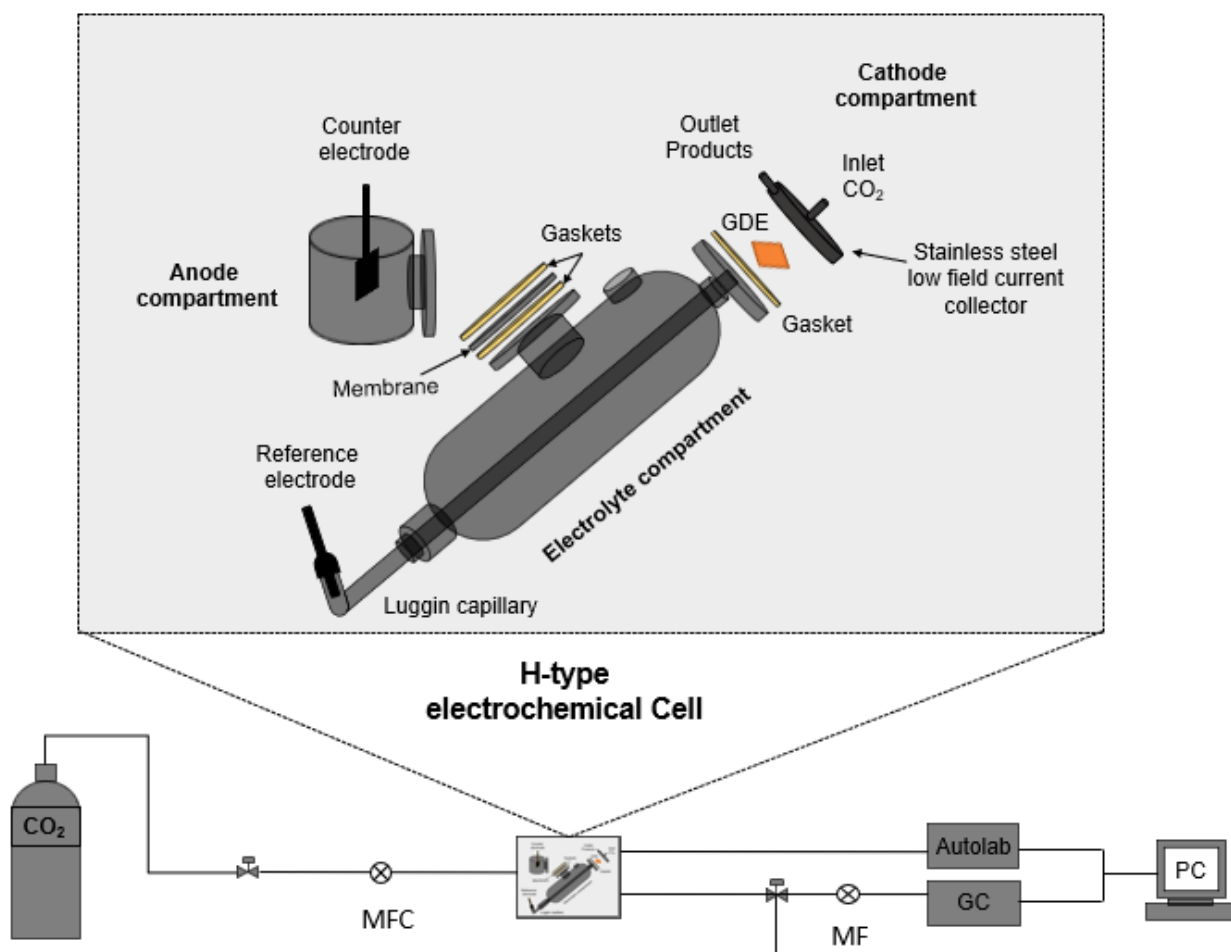

**Figure S13.** The CO<sub>2</sub>RR workstation equipped with a homemade H-type cell.

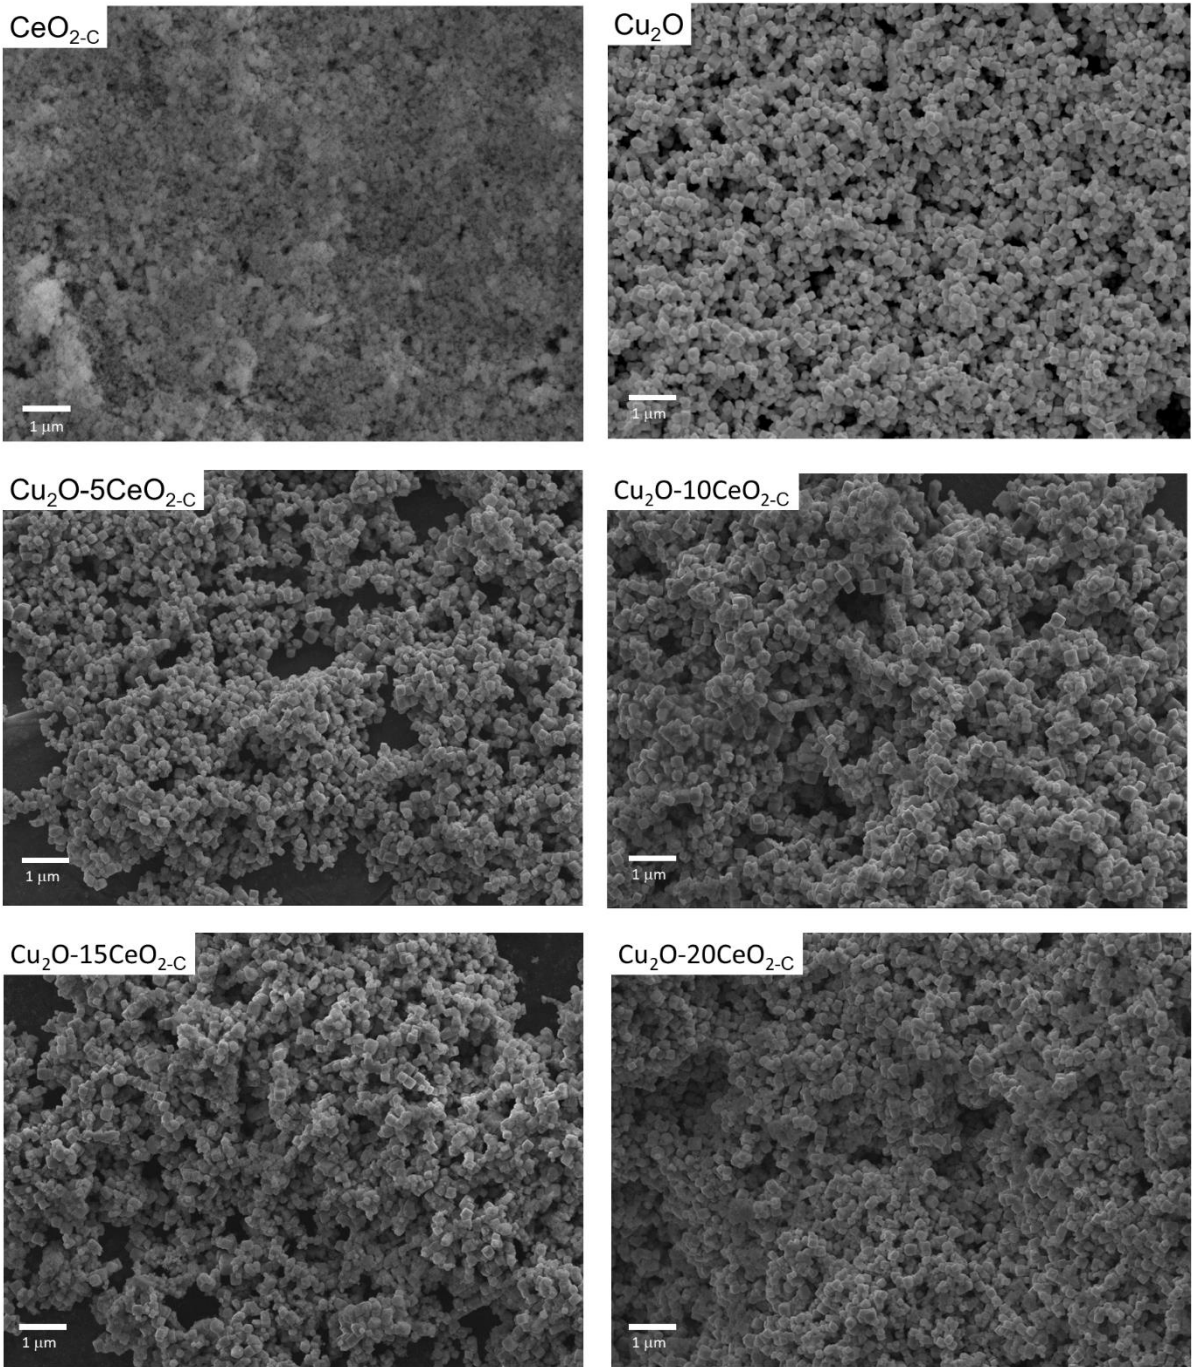

**Figure SI4.** SEM images of the series of  $\text{CeO}_{2-c}$ -promoted  $\text{Cu}_2\text{O}$ -based catalysts. Cubic-like  $\text{CeO}_{2-c}$  was prepared at  $T = 240^\circ\text{C}$

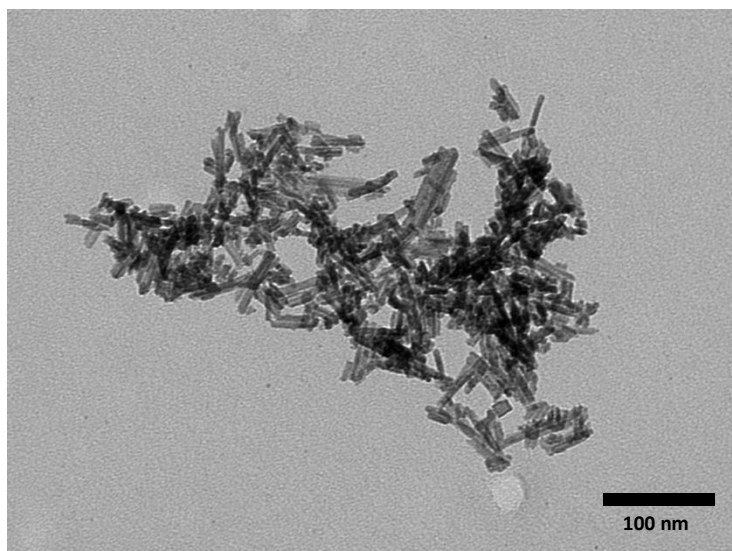

Figure S15. TEM images of the rod-like CeO<sub>2-R</sub> prepared at T = 80°C

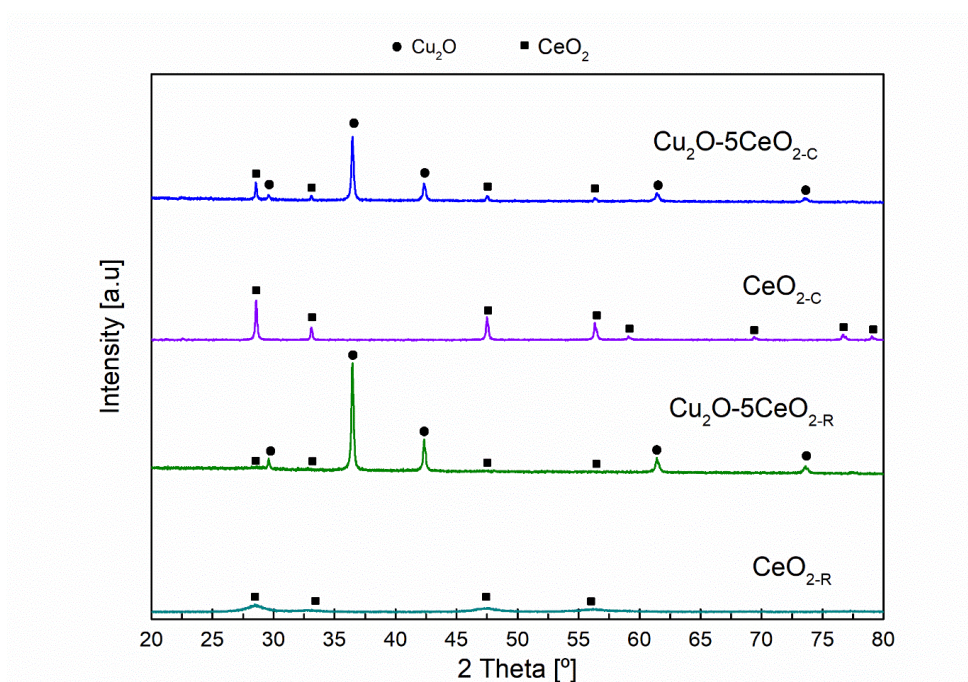

Figure S16. XRD pattern of the Cu<sub>2</sub>O-5CeO<sub>2-C</sub>, Cu<sub>2</sub>O-5CeO<sub>2-R</sub>, CeO<sub>2-C</sub> and CeO<sub>2-R</sub>



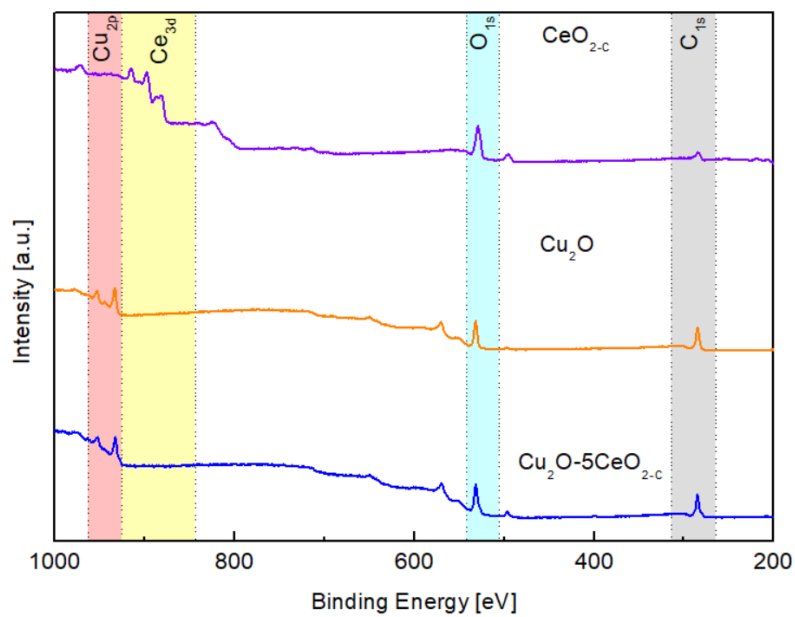

Figure S17. XPS spectra of CeO<sub>2-c</sub>, Cu<sub>2</sub>O and Cu<sub>2</sub>O-5CeO<sub>2-c</sub> catalysts.

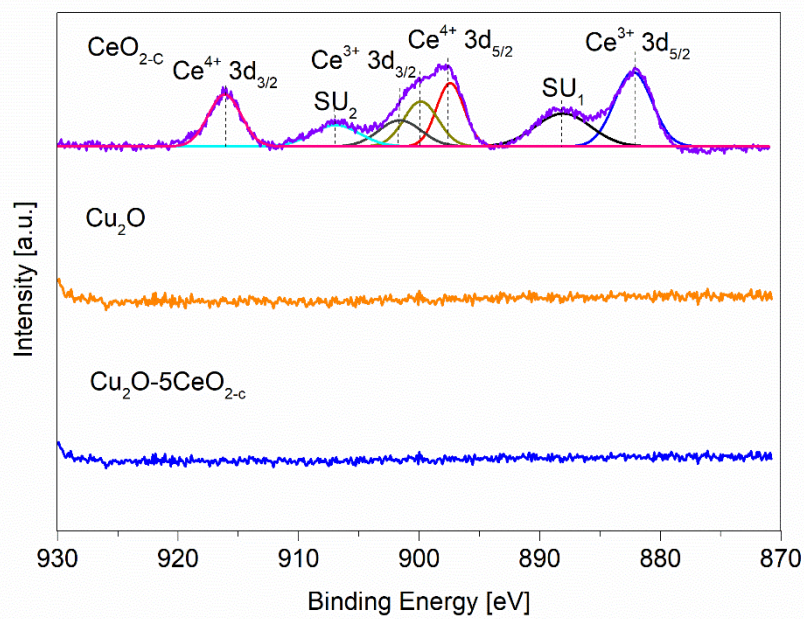

Figure S18. Ce 3d XPS spectra of CeO<sub>2-c</sub>, Cu<sub>2</sub>O and Cu<sub>2</sub>O-5CeO<sub>2-c</sub>.

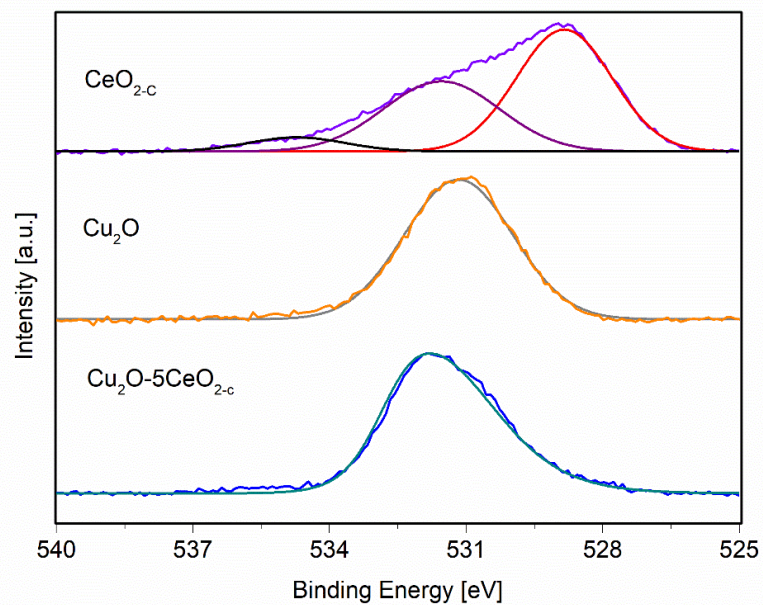

Figure S19. O 1s XPS spectra of  $\text{CeO}_{2-c}$ ,  $\text{Cu}_2\text{O}$  and  $\text{Cu}_2\text{O}-5\text{CeO}_{2-c}$ .

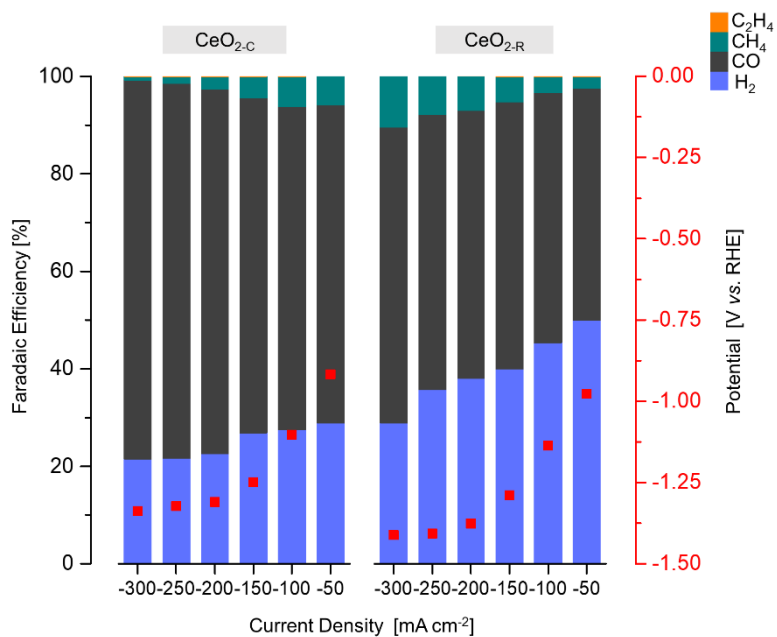

Figure S110. Performance comparison between  $\text{CeO}_{2-c}$  and  $\text{CeO}_{2-R}$  GDEs. The FE [%] and potential [V vs. RHE] as a function of the  $j$  [ $\text{mA cm}^{-2}$ ].

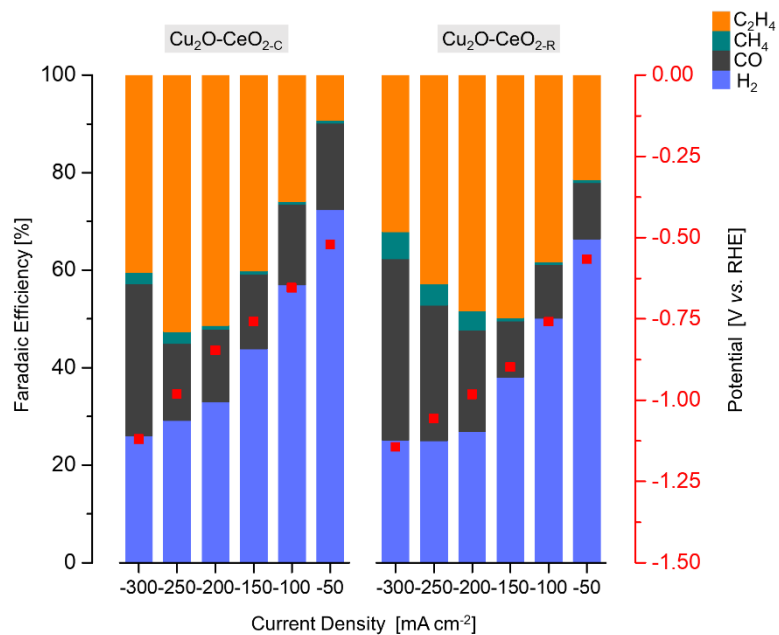

**Figure SI11.** Performance comparison between  $\text{Cu}_2\text{O-5CeO}_{2-\text{C}}$  and  $\text{Cu}_2\text{O-5CeO}_{2-\text{R}}$  GDEs. The FE [%] and potential [V vs. RHE] as a function of the  $j$  [ $\text{mA cm}^{-2}$ ].

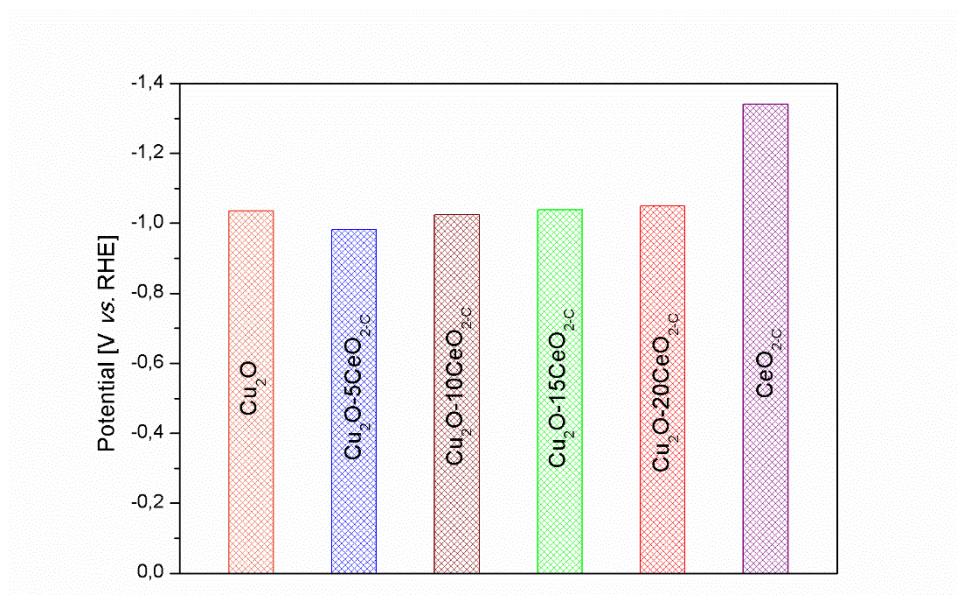

**Figure SI12.** Potential values of the series of GDEs at  $j = 250 \text{ mA cm}^{-2}$ .



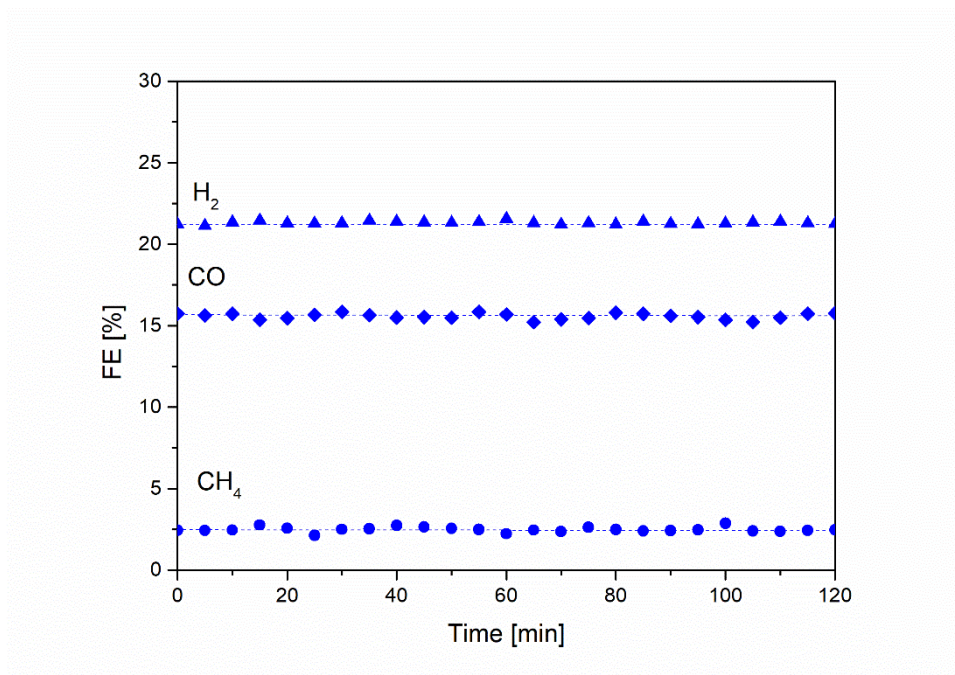

**Figure SI13.** FE [%] as a function of the time [h] over the Cu<sub>2</sub>O-5CeO<sub>2-C</sub> GDE. Reaction conditions: electrolyte = 1 M KOH and  $j = -250\text{m Acm}^{-2}$ .

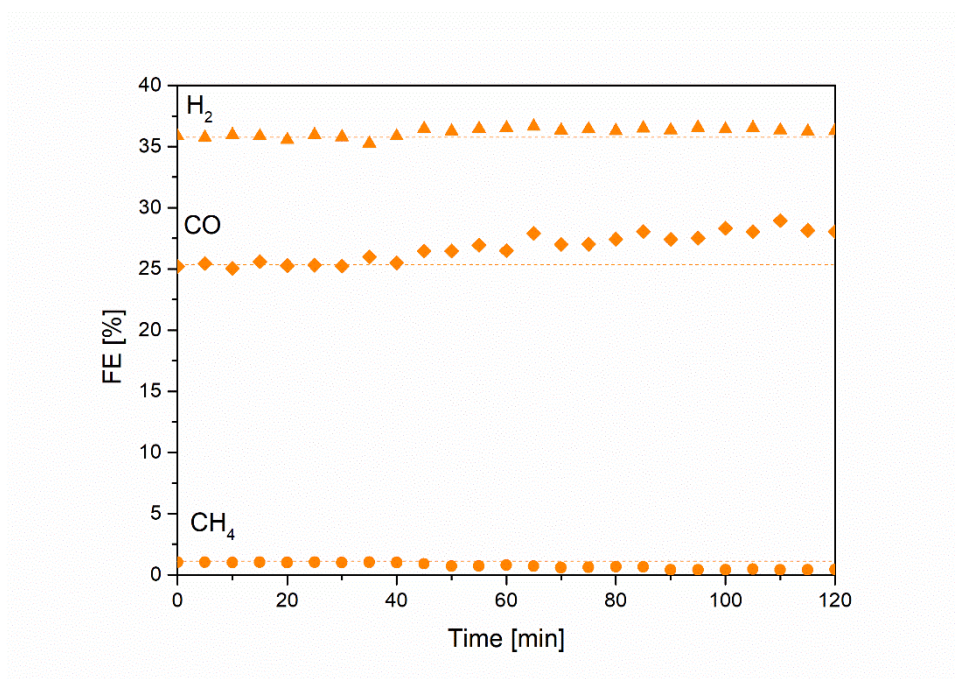

**Figure SI14.** FE [%] as a function of the time [h] over the Cu<sub>2</sub>O GDE. Reaction conditions: electrolyte = 1 M KOH and  $j = -250\text{m Acm}^{-2}$ .

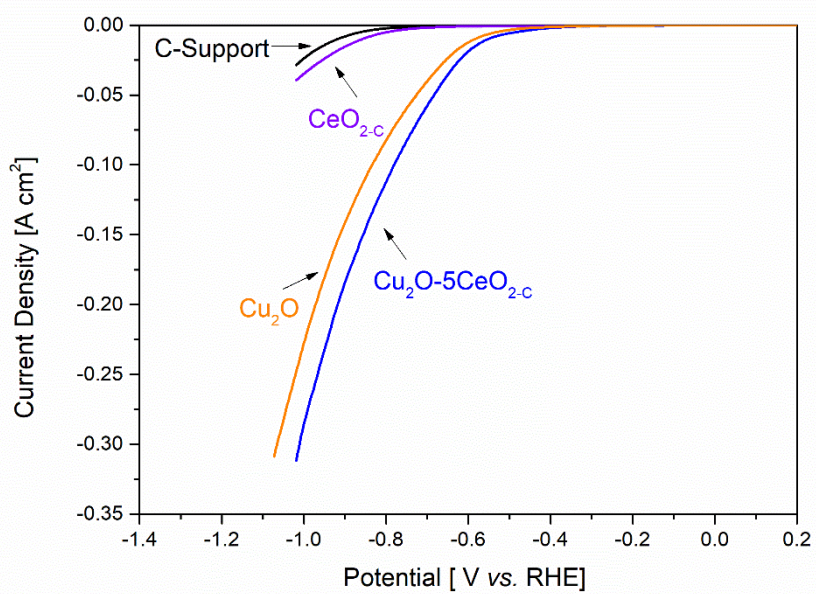

**Figure S115.** LSV curves on the different GDEs with a CO<sub>2</sub>-flowed at 1 M KOH electrolyte.

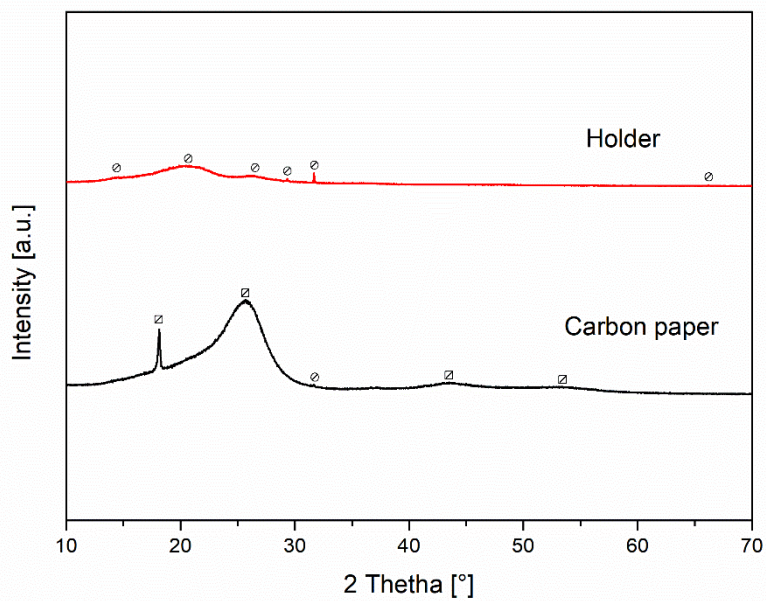

**Figure S116.** XRD pattern of blank (holder) and support (carbon paper)

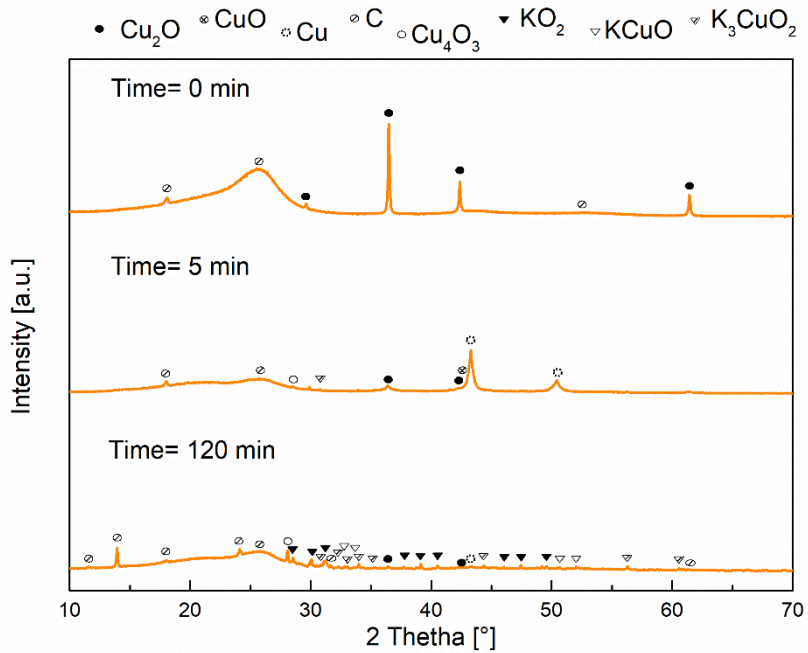

Figure S117. XRD pattern of  $\text{Cu}_2\text{O}$  GDEs at different reaction times.

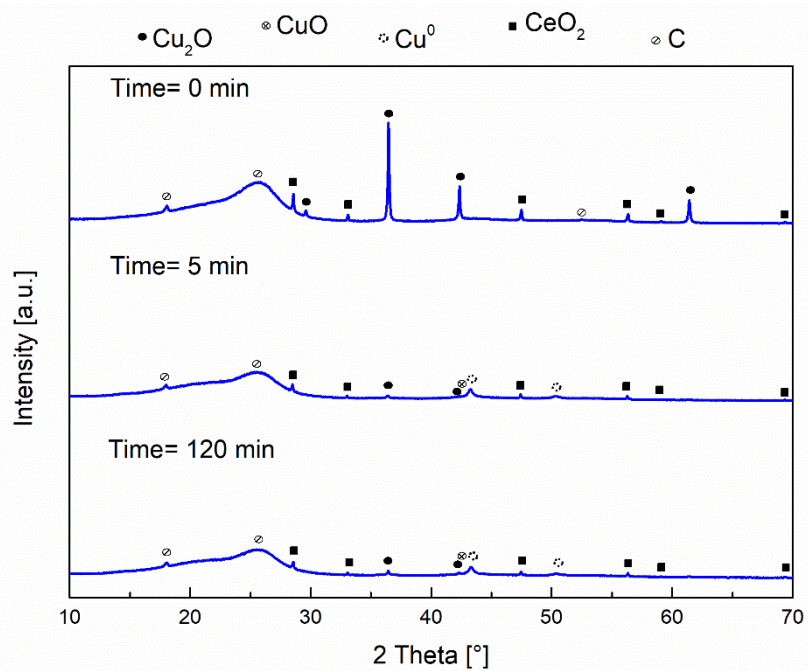

Figure S118. XRD pattern of  $\text{Cu}_2\text{O}$ - $5\text{CeO}_2$  GDEs at different reaction times.

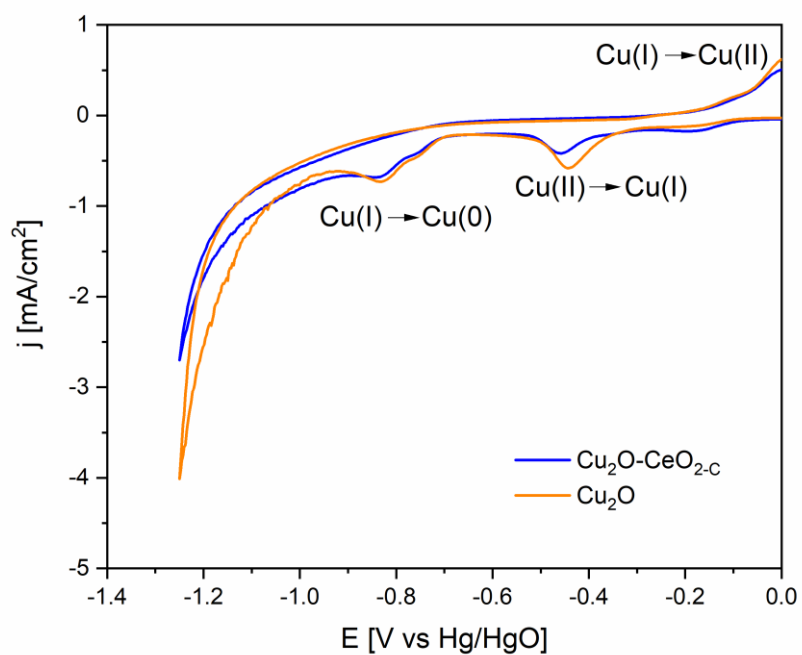

**Figure S119.** CV curves on the  $\text{Cu}_2\text{O}$  and  $\text{Cu}_2\text{O-CeO}_2\text{-C}$  GDEs with a  $\text{CO}_2$ -flowed at 1 M KOH electrolyte.

**Table S11.** Crystallite sizes of the main  $\text{Cu}^x$  species of the fresh and used GDEs.

| Sample                       |       | $dp_{\text{Cu}_2\text{O}}$<br>[nm] | $dp_{\text{CuO}}$<br>[nm] | $dp_{\text{Cu}}$<br>[nm] | $dp_{\text{CeO}_2}$<br>[nm] |
|------------------------------|-------|------------------------------------|---------------------------|--------------------------|-----------------------------|
| $\text{Cu}_2\text{O}$        | Fresh | 167                                | -                         | -                        | -                           |
|                              | Used  | 196                                | 87                        | 20                       | -                           |
| $\text{Cu}_2\text{O-5CeO}_2$ | Fresh | 162                                | -                         | -                        | 45                          |
|                              | Used  | 164                                | 25                        | 13                       | 49                          |

**Table S12.** Elemental composition of the fresh and used GDEs.

| Sample                       |       | O<br>[wt.%] | Cu<br>[wt.%] | Ce<br>[wt.%] | K<br>[wt.%] |
|------------------------------|-------|-------------|--------------|--------------|-------------|
| $\text{Cu}_2\text{O}$        | Fresh | 11          | 89           | .            | -           |
|                              | Used  | 18          | 40           | -            | 42          |
| $\text{Cu}_2\text{O-5CeO}_2$ | Fresh | 13          | 82           | 5            | -           |
|                              | Used  | 9           | 79           | 6            | 6           |



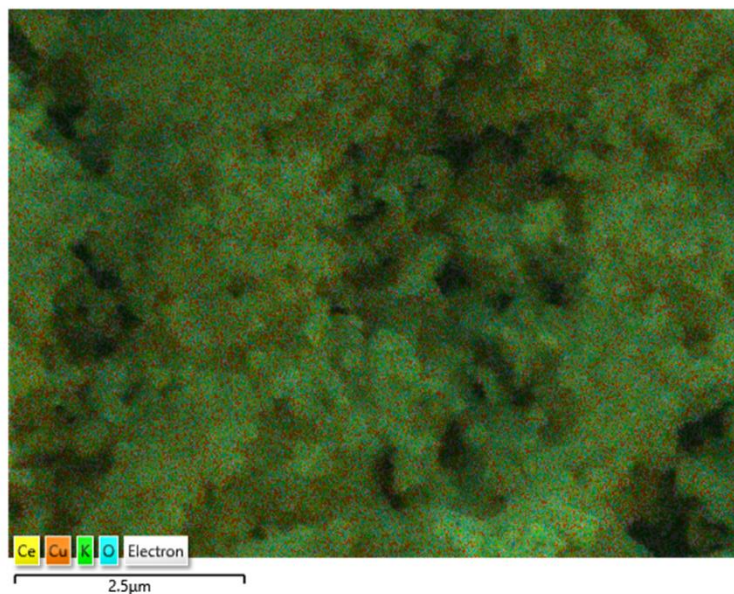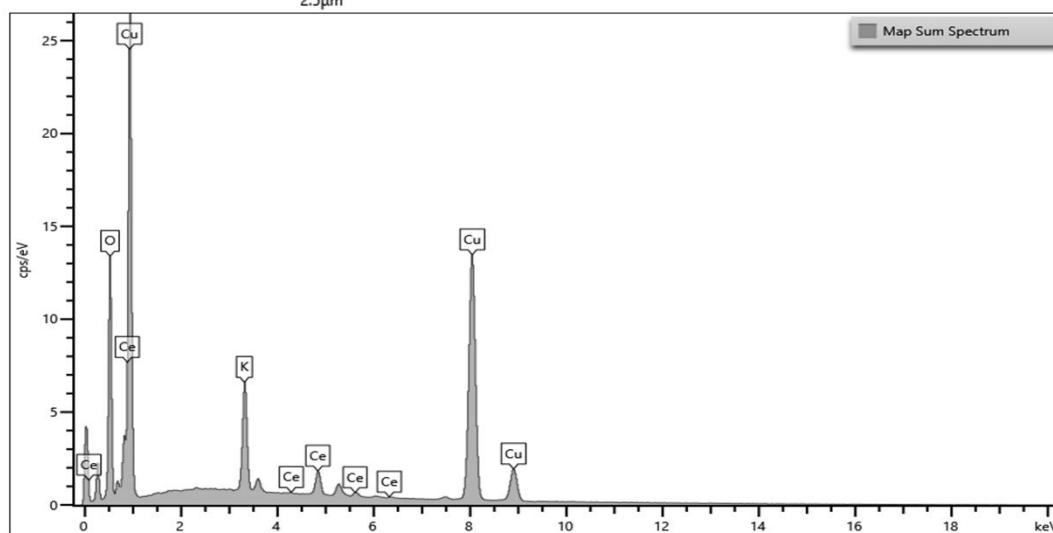

Figure S120. Post-catalysis SEM-EDS for  $\text{Cu}_2\text{O}-5\text{CeO}_2$  GDE.



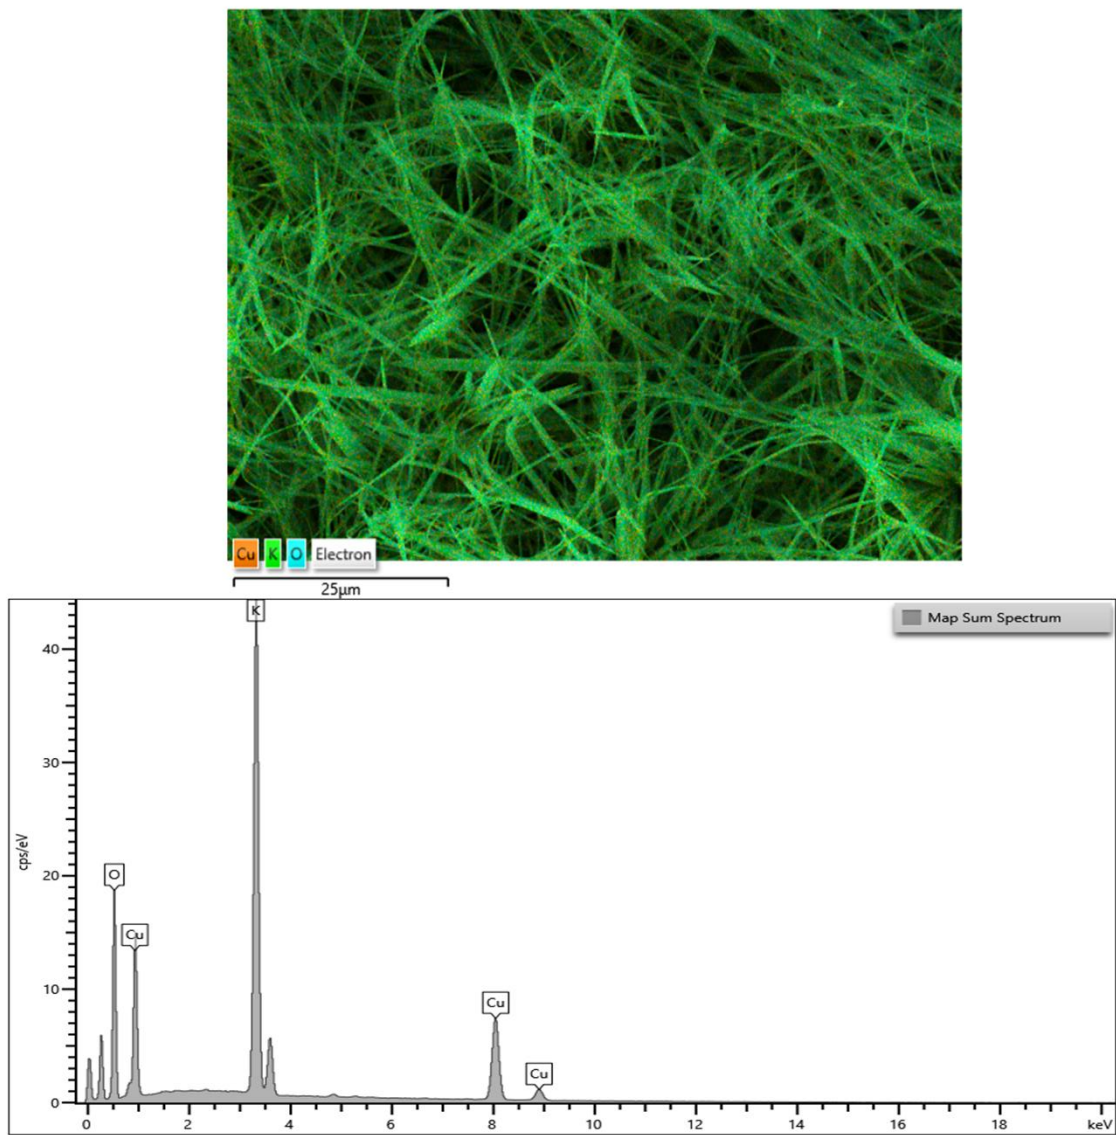

Figure S121. Post-catalysis SEM-EDS for Cu<sub>2</sub>O GDE.
